# Supplementary material for: Perfluorocyclobutane (PFC-318, c -C 4 F 8 ) in the global atmosphere
Source: Copernicus journal article supplement (doi:10.5194/acp-19-10335-2019), 2019-08-14
Supplement: Supplementary file 1 [file Muhle et al. c-C4F8 2019 Supplemental tables.xlsx]

## Sheet: TableSa-CSIRO-Inversion
% Muhle et al. c-C4F8 2019 Atmospheric Chemistry and Physics Supporting Information Table Sa
% CSIRO inversion for c-C4F8: estimated emissions and corresponding mole fractions.
% Note that annual emissions correspond to the calendar year (centred on mid-year) while annual mole fraction (mf) values correspond to the beginning of the year.
% Sat Mar 16 23:04:01 2019
%
% The results are based on the SIO-14 primary calibration scale.
% Em: Global Emissions in kt/yr (equal to Gg/yr); _m: best estimate; _up: upper (2 stdv); _lo lower (2 stdv); mf: mole fraction (dry air) in ppt.
% HL: High Latitude from surface box: HL_NH_mf 30--90 N; HL_SH_mf 30--90S.
% NH: Northern Hemisphere mean of mole fractions from surface boxes 0--30 and 30--90 N; SH: Equivalent for Southern Hemisphere.
%
% Time	c-C4F8	c-C4F8	c-C4F8	Time	c-C4F8	c-C4F8	c-C4F8	c-C4F8
% for_Em	Em_m	Em_up	Em_lo	for_mf	HL_NH_mf	HL_SH_mf	NH_mf	SH_mf
% [yr]	[kt/yr]	[kt/yr]	[kt/yr]	[yr]	[ppt]	[ppt]	[ppt]	[ppt]
1900.5	0.05957	0.10897	0.01187	1901	0.0029515	0.0010899	0.0027567	0.0013546
1901.5	0.05798	0.10473	0.01153	1902	0.0047567	0.0028299	0.0045547	0.0031053
1902.5	0.05531	0.09694	0.011	1903	0.0063312	0.0044839	0.006138	0.0047475
1903.5	0.05194	0.08633	0.01041	1904	0.0077512	0.0060125	0.0075697	0.0062606
1904.5	0.04813	0.07613	0.00993	1905	0.0090329	0.0074169	0.0088645	0.0076478
1905.5	0.04406	0.06573	0.00969	1906	0.0101826	0.008698	0.0100281	0.0089105
1906.5	0.03983	0.05588	0.00979	1907	0.0112032	0.0098552	0.0110631	0.0100488
1907.5	0.03549	0.04978	0.01032	1908	0.0120954	0.0108878	0.01197	0.0110618
1908.5	0.03107	0.04458	0.00607	1909	0.0128586	0.0117946	0.0127483	0.0119486
1909.5	0.02656	0.03998	0.00055	1910	0.0134916	0.0125739	0.0133966	0.0127075
1910.5	0.02198	0.0352	0	1911	0.0139924	0.0132241	0.013913	0.0133367
1911.5	0.01731	0.03024	0	1912	0.0143587	0.0137428	0.0142953	0.0138341
1912.5	0.01256	0.02656	0	1913	0.0145882	0.0141278	0.014541	0.0141973
1913.5	0.00776	0.02991	0	1914	0.0146802	0.0143775	0.0146496	0.0144247
1914.5	0.00319	0.03519	0	1915	0.0146475	0.0144955	0.0146326	0.0145215
1915.5	0.00034	0.03994	0	1916	0.014571	0.0145162	0.0145663	0.0145285
1916.5	0.00013	0.04348	0	1917	0.0145508	0.0145075	0.0145472	0.0145183
1917.5	9e-05	0.04526	0	1918	0.0145437	0.0145018	0.0145402	0.0145125
1918.5	4e-05	0.04492	0	1919	0.0145396	0.014499	0.0145362	0.0145096
1919.5	0	0.04244	0	1920	0.0145367	0.0144972	0.0145334	0.0145077
1920.5	0	0.03802	0	1921	0.0145356	0.0144961	0.0145323	0.0145066
1921.5	0	0.03213	0	1922	0.0145351	0.0144956	0.0145318	0.0145061
1922.5	0	0.02544	0	1923	0.0145349	0.0144953	0.0145315	0.0145058
1923.5	0	0.01856	0	1924	0.0145347	0.0144952	0.0145314	0.0145057
1924.5	0	0.012	0	1925	0.0145347	0.0144951	0.0145314	0.0145056
1925.5	0	0.01047	0	1926	0.0145347	0.0144951	0.0145313	0.0145056
1926.5	0	0.00965	0	1927	0.0145347	0.0144951	0.0145313	0.0145056
1927.5	0	0.00849	0	1928	0.0145346	0.0144951	0.0145313	0.0145056
1928.5	0	0.00692	0	1929	0.0145346	0.0144951	0.0145313	0.0145056
1929.5	0	0.00608	0	1930	0.0145346	0.0144951	0.0145313	0.0145056
1930.5	0	0.00455	0	1931	0.0145346	0.0144951	0.0145313	0.0145056
1931.5	0	0.00328	0	1932	0.0145346	0.0144951	0.0145313	0.0145056
1932.5	0	0.00145	0	1933	0.0145346	0.0144951	0.0145313	0.0145056
1933.5	0	0.00046	0	1934	0.0145346	0.0144951	0.0145313	0.0145056
1934.5	0	0.00149	0	1935	0.0145346	0.0144951	0.0145313	0.0145056
1935.5	0	0.00225	0	1936	0.0145346	0.0144951	0.0145313	0.0145056
1936.5	0	0.00207	0	1937	0.0145346	0.0144951	0.0145313	0.0145056
1937.5	0	0.00099	0	1938	0.0145346	0.0144951	0.0145313	0.0145056
1938.5	0	0.00032	0	1939	0.0145346	0.0144951	0.0145313	0.0145056
1939.5	0	0.0003	0	1940	0.0145346	0.0144951	0.0145313	0.0145056
1940.5	0	0.00025	0	1941	0.0145346	0.0144951	0.0145313	0.0145056
1941.5	0	0.00046	0	1942	0.0145346	0.0144951	0.0145313	0.0145056
1942.5	0	0.00028	0	1943	0.0145346	0.0144951	0.0145313	0.0145056
1943.5	0	9e-05	0	1944	0.0145346	0.0144951	0.0145313	0.0145056
1944.5	0	0.00027	0	1945	0.0145346	0.0144951	0.0145313	0.0145056
1945.5	0	0.00081	0	1946	0.0145346	0.0144951	0.0145313	0.0145056
1946.5	0	0.00132	0	1947	0.0145347	0.0144951	0.0145313	0.0145056
1947.5	0	0.00153	0	1948	0.0145347	0.0144951	0.0145313	0.0145056
1948.5	0	0.0013	0	1949	0.0145347	0.0144951	0.0145313	0.0145056
1949.5	0	0.00082	0	1950	0.0145347	0.0144951	0.0145313	0.0145056
1950.5	0	0.00046	0	1951	0.0145347	0.0144951	0.0145313	0.0145056
1951.5	0	0.00063	0	1952	0.0145347	0.0144951	0.0145313	0.0145056
1952.5	0	0.00129	0	1953	0.0145347	0.0144951	0.0145313	0.0145056
1953.5	0	0.00659	0	1954	0.0145347	0.0144951	0.0145313	0.0145056
1954.5	0	0.02453	0	1955	0.0145347	0.0144951	0.0145313	0.0145056
1955.5	0	0.05435	0	1956	0.0145347	0.0144951	0.0145313	0.0145056
1956.5	0	0.09753	0	1957	0.0145347	0.0144951	0.0145313	0.0145056
1957.5	0	0.1492	0	1958	0.0145347	0.0144951	0.0145313	0.0145056
1958.5	0	0.20226	0	1959	0.0145347	0.0144951	0.0145313	0.0145056
1959.5	0	0.25613	0	1960	0.0145347	0.0144951	0.0145313	0.0145056
1960.5	0.01512	0.31579	0	1961	0.0152838	0.0147717	0.015231	0.0148494
1961.5	0.05318	0.38023	0	1962	0.0176477	0.0159171	0.0174673	0.0161684
1962.5	0.11295	0.48439	0	1963	0.022259	0.0185852	0.0218751	0.0191136
1963.5	0.19048	0.60357	0	1964	0.0295498	0.0233327	0.0288998	0.0242239
1964.5	0.27969	0.71645	0.04028	1965	0.0397149	0.0305513	0.0387569	0.0318629
1965.5	0.37388	0.79854	0.11393	1966	0.0527312	0.040438	0.0514463	0.0421965
1966.5	0.46734	0.84304	0.21072	1967	0.0684267	0.0530116	0.0668161	0.0552162
1967.5	0.55604	0.86344	0.32364	1968	0.0865508	0.0681578	0.0846298	0.0707887
1968.5	0.63786	0.85912	0.44774	1969	0.106839	0.0856855	0.10463	0.0887122
1969.5	0.71245	0.83115	0.57926	1970	0.12906	0.10538	0.126589	0.10877
1970.5	0.78049	0.8494	0.61349	1971	0.153036	0.127042	0.150325	0.130766
1971.5	0.84278	0.93053	0.56349	1972	0.178621	0.150498	0.175688	0.15453
1972.5	0.89946	1.04331	0.4967	1973	0.205657	0.175588	0.202523	0.179903
1973.5	0.94922	1.1627	0.44951	1974	0.229085	0.203348	0.228404	0.20434
1974.5	1.0122	1.28111	0.4596	1975	0.259666	0.231595	0.259009	0.232553
1975.5	1.09766	1.35177	0.58635	1976	0.294087	0.261662	0.293362	0.262719
1976.5	1.173	1.40249	0.75004	1977	0.330859	0.293869	0.330158	0.294899
1977.5	1.22891	1.42669	0.88498	1978	0.368453	0.327932	0.367783	0.328923
1978.5	1.21773	1.3377	0.98456	1979	0.403503	0.362514	0.40295	0.363349
1979.5	1.21988	1.31907	1.08664	1980	0.438655	0.396929	0.438187	0.39765
1980.5	1.20285	1.3105	1.11037	1981	0.472903	0.430979	0.472584	0.431499
1981.5	1.20086	1.30981	1.10784	1982	0.507361	0.464758	0.507155	0.465127
1982.5	1.1877	1.33179	1.05292	1983	0.541122	0.498289	0.541041	0.498486
1983.5	1.19285	1.34481	1.03555	1984	0.575347	0.531777	0.575329	0.531892
1984.5	1.20861	1.35424	1.06618	1985	0.610227	0.565638	0.610219	0.565738
1985.5	1.21583	1.32516	1.10054	1986	0.644851	0.599903	0.644818	0.600037
1986.5	1.198	1.30171	1.09614	1987	0.677883	0.634068	0.677805	0.634263
1987.5	1.09675	1.20381	1.00702	1988	0.705125	0.666454	0.70508	0.666605
1988.5	1.03869	1.14151	0.95262	1989	0.73173	0.696556	0.73166	0.696741
1989.5	0.99744	1.09344	0.90759	1990	0.757755	0.725222	0.757636	0.725473
1990.5	0.95918	1.05283	0.86821	1991	0.782917	0.752765	0.782756	0.753074
1991.5	0.88212	0.97635	0.78519	1992	0.804977	0.778569	0.804878	0.778793
1992.5	0.81653	0.91007	0.7209	1993	0.82513	0.802411	0.825032	0.802635
1993.5	0.77486	0.8639	0.68196	1994	0.844979	0.824729	0.844868	0.82497
1994.5	0.75843	0.84079	0.66456	1995	0.865463	0.846228	0.865345	0.846478
1995.5	0.76569	0.84544	0.67373	1996	0.887148	0.867646	0.887017	0.867914
1996.5	0.78126	0.86532	0.68991	1997	0.909752	0.889438	0.909613	0.889718
1997.5	0.79801	0.88682	0.70937	1998	0.932987	0.91173	0.932847	0.912012
1998.5	0.77631	0.86763	0.68588	1999	0.954373	0.933937	0.954274	0.934164
1999.5	0.75968	0.85328	0.6657	2000	0.975207	0.955619	0.975124	0.955823
2000.5	0.74381	0.83529	0.65293	2001	0.995619	0.976812	0.995555	0.976991
2001.5	0.7406	0.83589	0.65303	2002	1.01644	0.997716	1.0164	0.997865
2002.5	0.76731	0.86788	0.68403	2003	1.03914	1.01897	1.03911	1.01911
2003.5	0.82606	0.92829	0.74441	2004	1.06473	1.0415	1.06468	1.04166
2004.5	0.90703	1.0058	0.82114	2005	1.09347	1.0661	1.09337	1.06633
2005.5	0.99938	1.10309	0.90544	2006	1.12529	1.09326	1.12511	1.09359
2006.5	1.08859	1.2012	0.98831	2007	1.15959	1.12305	1.15934	1.12348
2007.5	1.16161	1.2823	1.06023	2008	1.19557	1.15511	1.19529	1.1556
2008.5	1.20729	1.31515	1.09776	2009	1.23242	1.18869	1.23222	1.18904
2009.5	1.27559	1.38855	1.15377	2010	1.2721	1.22377	1.27203	1.22396
2010.5	1.37355	1.52556	1.18714	2011	1.31604	1.2611	1.31614	1.26105
2011.5	1.48545	1.62498	1.33041	2012	1.36335	1.30153	1.36355	1.30135
2012.5	1.57047	1.69207	1.4389	2013	1.41175	1.3449	1.41197	1.34468
2013.5	1.63968	1.76356	1.50668	2014	1.46096	1.39058	1.46111	1.39046
2014.5	1.74542	1.88547	1.60717	2015	1.51436	1.43875	1.51441	1.43877
2015.5	1.88135	2.02107	1.74083	2016	1.57298	1.49031	1.57295	1.49045
2016.5	2.07168	2.21025	1.92693	2017	1.63928	1.54652	1.63916	1.54677
2017.5	2.23709	2.38691	2.05616	2018	1.709	1.60798	1.70869	1.60848

## Sheet: TableSb-Bristol-Inversion
% Muhle et al. c-C4F8 2019 Atmospheric Chemistry and Physics Supporting Information Table Sb
% Bristol inversion for c-C4F8: estimated emissions and corresponding mole fractions.
% Note that annual emissions correspond to the calendar year (centred on mid-year) while mole fraction (mf) values correspond to the fractional date given in the Time for_mf column.
% Mon Feb 25 06:20:06 2019
%
% The results are based on the SIO-14 primary calibration scale.
% Em: Global emissions in kt/yr (equal to Gg/yr); _m: best estimate; 16%ile; 84%ile; mf: mole fraction (dry air) in ppt.
% Mol fractions are given for the following model boxes: 30-90N; 0-30N; 0-30S; 30-90S
%
%
% Time	c-C4F8	c-C4F8	c-C4F8	Time	c-C4F8	c-C4F8	c-C4F8	c-C4F8
% for_Em	Em_m	16%ile	84%ile	for_mf	30-90N_mf	0-30N_mf	0-30S_mf	30-90S_mf
% [yr]	[kt/yr]	[kt/yr]	[kt/yr]	[yr]	[ppt]	[ppt]	[ppt]	[ppt]
1973.5	0.80467	0.51886	1.09717	1973.04	0.22638	0.22435	0.21346	0.20683
1974.5	0.82841	0.59544	1.04775	1973.12	0.22989	0.23028	0.21877	0.21106
1975.5	0.89611	0.68548	1.09824	1973.21	0.23251	0.23309	0.22207	0.21425
1976.5	0.98206	0.78562	1.15763	1973.29	0.23506	0.23578	0.22457	0.21688
1977.5	1.048	0.88907	1.25462	1973.38	0.23752	0.23787	0.22687	0.21917
1978.5	1.07279	0.90052	1.2843	1973.46	0.23971	0.23967	0.22948	0.2215
1979.5	1.09897	0.96944	1.27431	1973.54	0.2418	0.24156	0.23126	0.22385
1980.5	1.12679	0.96739	1.3103	1973.62	0.2441	0.24369	0.23325	0.22613
1981.5	1.15657	0.98015	1.35463	1973.71	0.24676	0.24659	0.23534	0.22828
1982.5	1.18034	0.98854	1.40092	1973.79	0.24948	0.24981	0.23751	0.23045
1983.5	1.20229	0.99927	1.40219	1973.88	0.25205	0.25242	0.24011	0.2323
1984.5	1.22056	1.06121	1.36271	1973.96	0.2547	0.25513	0.24252	0.23401
1985.5	1.2202	1.0418	1.38132	1974.04	0.25687	0.25693	0.24588	0.23621
1986.5	1.18926	1.00241	1.34527	1974.12	0.25892	0.25883	0.24896	0.23896
1987.5	1.0988	0.93478	1.2638	1974.21	0.26113	0.26088	0.25107	0.24184
1988.5	1.03237	0.87002	1.20271	1974.29	0.26337	0.26332	0.2528	0.24428
1989.5	0.97679	0.81837	1.15529	1974.38	0.26549	0.26512	0.25461	0.24633
1990.5	0.92666	0.77676	1.09313	1974.46	0.2673	0.26661	0.25681	0.24843
1991.5	0.86942	0.7115	1.01093	1974.54	0.26904	0.26844	0.25811	0.25054
1992.5	0.80267	0.62165	0.95607	1974.62	0.27117	0.2705	0.25972	0.2526
1993.5	0.75719	0.56789	0.89619	1974.71	0.27383	0.27333	0.26159	0.25457
1994.5	0.73914	0.59261	0.90448	1974.79	0.27656	0.27647	0.26366	0.25661
1995.5	0.74244	0.58459	0.88367	1974.88	0.2791	0.27899	0.26618	0.25837
1996.5	0.75569	0.60806	0.92121	1974.96	0.28176	0.28161	0.26853	0.25997
1997.5	0.77219	0.62289	0.93661	1975.04	0.28417	0.28333	0.27182	0.26215
1998.5	0.76323	0.6032	0.90415	1975.12	0.28658	0.28523	0.27487	0.26491
1999.5	0.75078	0.58562	0.87836	1975.21	0.28907	0.28731	0.27693	0.26777
2000.5	0.74043	0.60414	0.87275	1975.29	0.29146	0.28983	0.27866	0.27011
2001.5	0.74364	0.60168	0.88347	1975.38	0.29367	0.29161	0.28046	0.27202
2002.5	0.77257	0.60283	0.91932	1975.46	0.29549	0.29308	0.28266	0.27405
2003.5	0.82537	0.67081	0.96299	1975.54	0.2972	0.29497	0.2839	0.2761
2004.5	0.89149	0.75766	1.06907	1975.62	0.29941	0.29713	0.2855	0.27814
2005.5	0.96245	0.80138	1.14666	1975.71	0.30228	0.30014	0.28742	0.28014
2006.5	1.02993	0.88019	1.16476	1975.79	0.30524	0.30351	0.28954	0.28223
2007.5	1.09353	0.95902	1.23185	1975.88	0.30796	0.30622	0.29219	0.28403
2008.5	1.16795	1.05875	1.33552	1975.96	0.31094	0.30895	0.29464	0.28569
2009.5	1.27207	1.13794	1.4244	1976.04	0.31353	0.31083	0.2981	0.28797
2010.5	1.42153	1.26669	1.56052	1976.12	0.31617	0.31291	0.30131	0.2909
2011.5	1.55945	1.43684	1.68149	1976.21	0.31895	0.31515	0.30347	0.29392
2012.5	1.6502	1.54319	1.76349	1976.29	0.32154	0.31782	0.30528	0.29635
2013.5	1.69793	1.57026	1.8133	1976.38	0.32394	0.31965	0.30715	0.29831
2014.5	1.77422	1.65941	1.87239	1976.46	0.32586	0.32118	0.30947	0.30042
2015.5	1.88544	1.76383	2.02744	1976.54	0.32763	0.32313	0.31083	0.30258
2016.5	2.05199	1.92023	2.19738	1976.62	0.32997	0.32542	0.31259	0.30476
2017.5	2.16167	2.00045	2.31349	1976.71	0.33311	0.32868	0.31467	0.3069
				1976.79	0.33637	0.33243	0.31692	0.30915
				1976.88	0.33934	0.33545	0.31978	0.31109
				1976.96	0.34273	0.33833	0.32242	0.31287
				1977.04	0.34524	0.34046	0.32615	0.31534
				1977.12	0.34775	0.34272	0.32961	0.3185
				1977.21	0.35062	0.34505	0.33189	0.32176
				1977.29	0.35326	0.34782	0.33378	0.32435
				1977.38	0.35574	0.34964	0.33574	0.32643
				1977.46	0.35769	0.35117	0.33819	0.32867
				1977.54	0.35945	0.35312	0.33966	0.33096
				1977.62	0.36187	0.35549	0.34157	0.33328
				1977.71	0.36517	0.35894	0.34379	0.33557
				1977.79	0.36864	0.36296	0.34616	0.33798
				1977.88	0.37178	0.36621	0.34921	0.34004
				1977.96	0.37548	0.36921	0.352	0.34193
				1978.04	0.37773	0.37152	0.35593	0.34457
				1978.12	0.37985	0.37385	0.35955	0.34796
				1978.21	0.38257	0.37618	0.36189	0.35141
				1978.29	0.38511	0.3789	0.36384	0.3541
				1978.38	0.38752	0.38063	0.36585	0.35625
				1978.46	0.38939	0.38207	0.36838	0.35856
				1978.54	0.39107	0.38399	0.36987	0.36092
				1978.62	0.39345	0.38637	0.37181	0.3633
				1978.71	0.39679	0.38989	0.37408	0.36566
				1978.79	0.40031	0.39397	0.3765	0.36813
				1978.88	0.40349	0.39726	0.37965	0.37025
				1978.96	0.40728	0.40028	0.3825	0.37218
				1979.04	0.40954	0.40266	0.38647	0.37493
				1979.12	0.41167	0.40507	0.3901	0.37845
				1979.21	0.41446	0.40745	0.39245	0.38201
				1979.29	0.41703	0.41019	0.39446	0.3847
				1979.38	0.41948	0.4119	0.39655	0.38683
				1979.46	0.42136	0.41333	0.39914	0.38918
				1979.54	0.42304	0.41528	0.40065	0.39155
				1979.62	0.42545	0.41772	0.40263	0.39398
				1979.71	0.42887	0.42133	0.40494	0.39638
				1979.79	0.43248	0.4255	0.40742	0.39891
				1979.88	0.43573	0.42885	0.41067	0.40107
				1979.96	0.43964	0.4319	0.41359	0.40305
				1980.04	0.44192	0.43436	0.4176	0.40591
				1980.12	0.4441	0.43688	0.42123	0.40957
				1980.21	0.44697	0.43933	0.4236	0.41322
				1980.29	0.44961	0.44211	0.42569	0.41592
				1980.38	0.45212	0.44381	0.42786	0.41804
				1980.46	0.45403	0.44525	0.43053	0.42042
				1980.54	0.45573	0.44725	0.43208	0.42283
				1980.62	0.45818	0.44975	0.4341	0.4253
				1980.71	0.46169	0.45347	0.43646	0.42775
				1980.79	0.46539	0.45773	0.43902	0.43035
				1980.88	0.46872	0.46114	0.44237	0.43257
				1980.96	0.47276	0.46424	0.44537	0.4346
				1981.04	0.47509	0.46681	0.44942	0.43757
				1981.12	0.47731	0.46943	0.45308	0.44137
				1981.21	0.48029	0.47196	0.45546	0.44513
				1981.29	0.483	0.4748	0.45763	0.44785
				1981.38	0.48558	0.4765	0.4599	0.44997
				1981.46	0.48754	0.47795	0.46266	0.45239
				1981.54	0.48925	0.48	0.46425	0.45484
				1981.62	0.49176	0.48257	0.46633	0.45737
				1981.71	0.49536	0.4864	0.46876	0.45988
				1981.79	0.49917	0.49076	0.47139	0.46255
				1981.88	0.50259	0.49426	0.47486	0.46484
				1981.96	0.50677	0.49741	0.47794	0.46692
				1982.04	0.50908	0.50008	0.48205	0.47001
				1982.12	0.51128	0.5028	0.48573	0.47397
				1982.21	0.5143	0.5054	0.48812	0.47784
				1982.29	0.51705	0.50826	0.49037	0.48057
				1982.38	0.51967	0.50994	0.49273	0.48269
				1982.46	0.52164	0.51139	0.49557	0.48515
				1982.54	0.52336	0.51347	0.4972	0.48764
				1982.62	0.52589	0.5161	0.49932	0.49022
				1982.71	0.52957	0.52003	0.5018	0.49279
				1982.79	0.53346	0.52446	0.5045	0.49552
				1982.88	0.53694	0.52801	0.50807	0.49786
				1982.96	0.54123	0.53119	0.51123	0.49998
				1983.04	0.54355	0.53395	0.51536	0.50319
				1983.12	0.54575	0.53677	0.51903	0.50729
				1983.21	0.54883	0.53943	0.52144	0.51127
				1983.29	0.55162	0.54231	0.52377	0.514
				1983.38	0.55428	0.54398	0.52622	0.5161
				1983.46	0.55628	0.54543	0.52913	0.51859
				1983.54	0.55801	0.54755	0.5308	0.52111
				1983.62	0.56057	0.55024	0.53294	0.52372
				1983.71	0.56432	0.55425	0.53547	0.52634
				1983.79	0.56829	0.55875	0.53823	0.52913
				1983.88	0.57182	0.56234	0.5419	0.53152
				1983.96	0.57622	0.56555	0.54513	0.53368
				1984.04	0.57852	0.56839	0.54928	0.53701
				1984.12	0.58071	0.5713	0.55295	0.54125
				1984.21	0.58383	0.57401	0.55535	0.54532
				1984.29	0.58666	0.57691	0.55776	0.54804
				1984.38	0.58935	0.57855	0.56029	0.55012
				1984.46	0.59136	0.58	0.56328	0.55264
				1984.54	0.59309	0.58217	0.56496	0.55518
				1984.62	0.59568	0.5849	0.56713	0.55782
				1984.71	0.59948	0.589	0.56969	0.56047
				1984.79	0.60351	0.59354	0.57252	0.56332
				1984.88	0.6071	0.59715	0.57628	0.56575
				1984.96	0.61157	0.60038	0.57957	0.56795
				1985.04	0.61375	0.60329	0.58372	0.57138
				1985.12	0.61576	0.60623	0.58735	0.57575
				1985.21	0.61879	0.60894	0.58973	0.5799
				1985.29	0.62155	0.61179	0.5922	0.58259
				1985.38	0.6242	0.61336	0.59481	0.58464
				1985.46	0.62615	0.61474	0.59784	0.58715
				1985.54	0.62783	0.61693	0.5995	0.58968
				1985.62	0.63039	0.61968	0.60163	0.59232
				1985.71	0.63418	0.62379	0.60418	0.59497
				1985.79	0.63821	0.62828	0.60704	0.59783
				1985.88	0.64177	0.63183	0.61085	0.60027
				1985.96	0.64623	0.63504	0.61416	0.60247
				1986.04	0.64815	0.63793	0.61823	0.60599
				1986.12	0.64983	0.64082	0.62174	0.61044
				1986.21	0.65262	0.64344	0.62404	0.61463
				1986.29	0.6552	0.64614	0.62655	0.61723
				1986.38	0.65768	0.64757	0.6292	0.61917
				1986.46	0.6595	0.64884	0.63221	0.62163
				1986.54	0.66108	0.65102	0.63376	0.62408
				1986.62	0.66353	0.65372	0.63577	0.62664
				1986.71	0.66721	0.65776	0.63822	0.62922
				1986.79	0.67111	0.66203	0.64106	0.63202
				1986.88	0.67456	0.66539	0.64484	0.63441
				1986.96	0.67884	0.66849	0.6481	0.63656
				1987.04	0.68024	0.67125	0.65196	0.6401
				1987.12	0.68122	0.67393	0.65522	0.64458
				1987.21	0.68345	0.67629	0.65734	0.6487
				1987.29	0.68561	0.67865	0.65984	0.6511
				1987.38	0.6877	0.67982	0.66247	0.65284
				1987.46	0.68922	0.68084	0.66536	0.65514
				1987.54	0.69058	0.68296	0.66664	0.65739
				1987.62	0.69278	0.6855	0.66835	0.65973
				1987.71	0.69613	0.68926	0.67055	0.66211
				1987.79	0.69968	0.69302	0.67327	0.66473
				1987.88	0.70281	0.69591	0.67686	0.66696
				1987.96	0.7066	0.69877	0.67993	0.66895
				1988.04	0.70804	0.70124	0.68336	0.67241
				1988.12	0.70914	0.70375	0.68616	0.67677
				1988.21	0.71127	0.706	0.68805	0.68069
				1988.29	0.71336	0.7082	0.69054	0.68275
				1988.38	0.71531	0.70927	0.69319	0.68419
				1988.46	0.71673	0.71021	0.69597	0.68627
				1988.54	0.71804	0.7124	0.69704	0.6883
				1988.62	0.72014	0.71491	0.69848	0.69042
				1988.71	0.72332	0.71851	0.70049	0.6926
				1988.79	0.72666	0.72189	0.70312	0.69506
				1988.88	0.7296	0.72444	0.70659	0.69716
				1988.96	0.73306	0.72713	0.70953	0.69902
				1989.04	0.7345	0.72941	0.71261	0.70242
				1989.12	0.73565	0.7318	0.71505	0.7067
				1989.21	0.73768	0.73397	0.71675	0.71046
				1989.29	0.7397	0.73604	0.71927	0.71226
				1989.38	0.74154	0.73703	0.72194	0.71346
				1989.46	0.74289	0.73791	0.72465	0.71537
				1989.54	0.74415	0.74016	0.72554	0.71722
				1989.62	0.74617	0.74264	0.72679	0.71917
				1989.71	0.7492	0.7461	0.72863	0.7212
				1989.79	0.75238	0.74917	0.73121	0.72352
				1989.88	0.75515	0.75143	0.73458	0.72552
				1989.96	0.75834	0.75399	0.73742	0.72728
				1990.04	0.75975	0.75611	0.7402	0.73065
				1990.12	0.76091	0.7584	0.74233	0.73487
				1990.21	0.76283	0.76051	0.74388	0.73851
				1990.29	0.76477	0.76245	0.74641	0.74008
				1990.38	0.76651	0.76336	0.74912	0.74108
				1990.46	0.76777	0.76418	0.75176	0.74285
				1990.54	0.76899	0.76648	0.75251	0.74455
				1990.62	0.77094	0.76893	0.75357	0.74635
				1990.71	0.77384	0.77228	0.75528	0.74824
				1990.79	0.77685	0.77506	0.75781	0.75046
				1990.88	0.77947	0.77706	0.76109	0.75236
				1990.96	0.78241	0.77949	0.76384	0.75404
				1991.04	0.78372	0.78147	0.76635	0.75738
				1991.12	0.78475	0.78364	0.7682	0.76156
				1991.21	0.78647	0.78565	0.76959	0.76509
				1991.29	0.78828	0.78743	0.77213	0.76644
				1991.38	0.78986	0.78823	0.77486	0.76725
				1991.46	0.79101	0.78896	0.77743	0.76888
				1991.54	0.79216	0.79129	0.77802	0.77043
				1991.62	0.794	0.79369	0.77889	0.77208
				1991.71	0.79672	0.79688	0.78043	0.77382
				1991.79	0.79955	0.79934	0.7829	0.77591
				1991.88	0.80199	0.80105	0.78608	0.77772
				1991.96	0.80464	0.80335	0.78872	0.77929
				1992.04	0.80579	0.80514	0.79094	0.78259
				1992.12	0.80666	0.80717	0.79247	0.78671
				1992.21	0.80815	0.80904	0.79369	0.79011
				1992.29	0.80978	0.81064	0.79624	0.79123
				1992.38	0.81117	0.81132	0.79897	0.79183
				1992.46	0.81218	0.81193	0.80145	0.7933
				1992.54	0.81324	0.81428	0.80184	0.79467
				1992.62	0.81495	0.8166	0.80249	0.79614
				1992.71	0.81748	0.81962	0.80385	0.79772
				1992.79	0.82007	0.82171	0.80624	0.79967
				1992.88	0.82231	0.82309	0.80929	0.80135
				1992.96	0.82462	0.82522	0.81179	0.80281
				1993.04	0.82585	0.82682	0.81369	0.80605
				1993.12	0.82686	0.82875	0.81489	0.81007
				1993.21	0.82832	0.83057	0.81595	0.81332
				1993.29	0.82994	0.83208	0.81851	0.8142
				1993.38	0.83126	0.83271	0.82127	0.81459
				1993.46	0.83224	0.83329	0.82368	0.81591
				1993.54	0.83329	0.83571	0.82393	0.81714
				1993.62	0.83495	0.83802	0.82442	0.81846
				1993.71	0.83736	0.84094	0.82565	0.81991
				1993.79	0.83982	0.84277	0.82799	0.82174
				1993.88	0.84193	0.84392	0.83095	0.82334
				1993.96	0.84402	0.84594	0.83337	0.82471
				1994.04	0.84542	0.84744	0.83504	0.82792
				1994.12	0.84669	0.84934	0.836	0.8319
				1994.21	0.84825	0.8512	0.83695	0.83505
				1994.29	0.84993	0.8527	0.83955	0.83575
				1994.38	0.85129	0.85334	0.84236	0.836
				1994.46	0.8523	0.85394	0.84476	0.83723
				1994.54	0.85338	0.85645	0.84495	0.83837
				1994.62	0.85505	0.85879	0.84536	0.83962
				1994.71	0.85745	0.86169	0.84654	0.84101
				1994.79	0.85988	0.86341	0.84887	0.84279
				1994.88	0.86196	0.86446	0.85183	0.84436
				1994.96	0.86396	0.86644	0.85423	0.84569
				1995.04	0.86552	0.86792	0.85577	0.84892
				1995.12	0.86701	0.86987	0.85661	0.85291
				1995.21	0.86871	0.87179	0.85752	0.85604
				1995.29	0.8705	0.87333	0.86016	0.85666
				1995.38	0.87193	0.874	0.86304	0.85683
				1995.46	0.873	0.87465	0.86548	0.85804
				1995.54	0.87414	0.87723	0.86567	0.85915
				1995.62	0.87585	0.87962	0.86608	0.86039
				1995.71	0.87829	0.88257	0.86726	0.86177
				1995.79	0.88076	0.88429	0.86963	0.86357
				1995.88	0.88285	0.88532	0.87263	0.86514
				1995.96	0.88489	0.88732	0.87505	0.86649
				1996.04	0.88654	0.88884	0.87656	0.86976
				1996.12	0.88816	0.89086	0.87736	0.87382
				1996.21	0.88996	0.89285	0.87826	0.87699
				1996.29	0.89183	0.89444	0.88097	0.87758
				1996.38	0.89334	0.89514	0.88392	0.87773
				1996.46	0.89445	0.89581	0.88641	0.87895
				1996.54	0.89564	0.89845	0.88664	0.88008
				1996.62	0.8974	0.9009	0.88707	0.88133
				1996.71	0.89989	0.90391	0.88828	0.88275
				1996.79	0.90242	0.90567	0.8907	0.88458
				1996.88	0.90456	0.90674	0.89376	0.88618
				1996.96	0.90666	0.90876	0.89624	0.88756
				1997.04	0.90836	0.91035	0.89776	0.89091
				1997.12	0.91005	0.91245	0.89855	0.89506
				1997.21	0.91192	0.91451	0.89947	0.89829
				1997.29	0.91385	0.91613	0.90224	0.89887
				1997.38	0.91541	0.91684	0.90525	0.89902
				1997.46	0.91657	0.91753	0.90781	0.90027
				1997.54	0.91778	0.92021	0.90807	0.90142
				1997.62	0.91958	0.92271	0.90853	0.90272
				1997.71	0.92214	0.92579	0.90979	0.90417
				1997.79	0.92472	0.92761	0.91226	0.90605
				1997.88	0.92692	0.92873	0.9154	0.90769
				1997.96	0.9291	0.93078	0.91792	0.9091
				1998.04	0.93063	0.93241	0.91947	0.91253
				1998.12	0.93206	0.93452	0.92026	0.91678
				1998.21	0.93379	0.93655	0.92116	0.92007
				1998.29	0.93562	0.93811	0.92396	0.92065
				1998.38	0.9371	0.93874	0.92702	0.92078
				1998.46	0.93819	0.93937	0.92959	0.92203
				1998.54	0.93934	0.94204	0.92982	0.92318
				1998.62	0.94109	0.94452	0.93024	0.92446
				1998.71	0.9436	0.94758	0.93147	0.9259
				1998.79	0.94615	0.94933	0.93395	0.92777
				1998.88	0.9483	0.95036	0.9371	0.92941
				1998.96	0.95042	0.95237	0.93962	0.93081
				1999.04	0.95189	0.95398	0.94109	0.93428
				1999.12	0.95327	0.95607	0.94177	0.93857
				1999.21	0.95494	0.95808	0.94262	0.94186
				1999.29	0.95672	0.95958	0.94546	0.94237
				1999.38	0.95815	0.96016	0.94855	0.94243
				1999.46	0.9592	0.96075	0.95112	0.94363
				1999.54	0.96033	0.96345	0.9513	0.94473
				1999.62	0.96204	0.96593	0.95166	0.94597
				1999.71	0.96451	0.96897	0.95284	0.94737
				1999.79	0.96701	0.97062	0.95532	0.94923
				1999.88	0.96912	0.97155	0.95846	0.95085
				1999.96	0.97117	0.97353	0.96097	0.95222
				2000.04	0.97263	0.9751	0.96234	0.95572
				2000.12	0.97402	0.97719	0.96291	0.96003
				2000.21	0.97567	0.97918	0.96371	0.96332
				2000.29	0.97744	0.98065	0.96658	0.96374
				2000.38	0.97885	0.9812	0.96971	0.96372
				2000.46	0.97987	0.98176	0.97228	0.96488
				2000.54	0.98098	0.98449	0.97241	0.96594
				2000.62	0.98268	0.98698	0.97271	0.96713
				2000.71	0.98513	0.99001	0.97386	0.9685
				2000.79	0.9876	0.99158	0.97634	0.97033
				2000.88	0.98967	0.99243	0.97949	0.97193
				2000.96	0.99166	0.99437	0.98199	0.97329
				2001.04	0.99322	0.99593	0.98327	0.97682
				2001.12	0.99474	0.99804	0.98374	0.98116
				2001.21	0.99647	1.00008	0.9845	0.98444
				2001.29	0.9983	1.00157	0.98741	0.9848
				2001.38	0.99975	1.00212	0.9906	0.98471
				2001.46	1.0008	1.0027	0.9932	0.98585
				2001.54	1.00194	1.00549	0.99332	0.98688
				2001.62	1.00366	1.00802	0.99361	0.98806
				2001.71	1.00614	1.01108	0.99475	0.98943
				2001.79	1.00863	1.01263	0.99726	0.99127
				2001.88	1.01072	1.01347	1.00045	0.99287
				2001.96	1.01272	1.01542	1.00297	0.99424
				2002.04	1.01449	1.01702	1.00422	0.99781
				2002.12	1.0163	1.01923	1.00465	1.00222
				2002.21	1.01825	1.02139	1.00541	1.00554
				2002.29	1.02025	1.02297	1.0084	1.00587
				2002.38	1.02183	1.02359	1.01167	1.00576
				2002.46	1.02299	1.02424	1.01434	1.00692
				2002.54	1.02421	1.02711	1.01452	1.00799
				2002.62	1.02602	1.02973	1.01487	1.00921
				2002.71	1.02861	1.03291	1.01609	1.01063
				2002.79	1.03123	1.03458	1.01867	1.01254
				2002.88	1.03342	1.03552	1.02195	1.0142
				2002.96	1.03557	1.03753	1.02455	1.01561
				2003.04	1.03758	1.03926	1.02588	1.01929
				2003.12	1.03969	1.04165	1.02638	1.02382
				2003.21	1.04193	1.04398	1.0272	1.02725
				2003.29	1.04414	1.04572	1.03029	1.02763
				2003.38	1.04592	1.04643	1.03366	1.02757
				2003.46	1.04723	1.04718	1.03646	1.02882
				2003.54	1.04855	1.05013	1.03676	1.02998
				2003.62	1.0505	1.05287	1.03725	1.03131
				2003.71	1.05328	1.05625	1.0386	1.03285
				2003.79	1.0561	1.05816	1.04129	1.03488
				2003.88	1.05847	1.05931	1.04474	1.03664
				2003.96	1.06089	1.06144	1.04748	1.03815
				2004.04	1.06307	1.06337	1.04898	1.04197
				2004.12	1.06541	1.06598	1.04964	1.04669
				2004.21	1.06792	1.06849	1.05057	1.05029
				2004.29	1.07034	1.0704	1.05376	1.05079
				2004.38	1.07233	1.07121	1.05724	1.05084
				2004.46	1.07378	1.07206	1.0602	1.05221
				2004.54	1.0752	1.07507	1.06066	1.05351
				2004.62	1.07729	1.07794	1.06134	1.055
				2004.71	1.08029	1.08154	1.06286	1.0567
				2004.79	1.08335	1.08376	1.06568	1.05888
				2004.88	1.08592	1.08516	1.06933	1.06078
				2004.96	1.08867	1.08744	1.07224	1.06241
				2005.04	1.09099	1.08961	1.07396	1.06641
				2005.12	1.09346	1.09244	1.07482	1.07134
				2005.21	1.09621	1.09514	1.07588	1.07515
				2005.29	1.09882	1.09721	1.07918	1.07581
				2005.38	1.101	1.0981	1.08278	1.07598
				2005.46	1.10259	1.09903	1.08591	1.07751
				2005.54	1.1041	1.1021	1.08653	1.07896
				2005.62	1.10632	1.1051	1.08741	1.08063
				2005.71	1.10955	1.10893	1.08911	1.08249
				2005.79	1.11285	1.11147	1.09208	1.08485
				2005.88	1.11564	1.11315	1.09594	1.0869
				2005.96	1.11874	1.11558	1.09902	1.08866
				2006.04	1.12112	1.11799	1.10099	1.09284
				2006.12	1.12364	1.12104	1.10207	1.09801
				2006.21	1.12658	1.12389	1.10324	1.10205
				2006.29	1.12933	1.12611	1.10665	1.10286
				2006.38	1.13167	1.12705	1.11036	1.10316
				2006.46	1.13337	1.12804	1.11366	1.10483
				2006.54	1.13494	1.13115	1.11444	1.10644
				2006.62	1.13727	1.13426	1.1155	1.10828
				2006.71	1.1407	1.13832	1.11737	1.11031
				2006.79	1.14424	1.14116	1.12047	1.11283
				2006.88	1.14722	1.14308	1.12454	1.11502
				2006.96	1.15065	1.14566	1.12779	1.11691
				2007.04	1.15307	1.14829	1.12998	1.12127
				2007.12	1.15563	1.15154	1.13125	1.12667
				2007.21	1.15874	1.15454	1.13254	1.13092
				2007.29	1.16162	1.15689	1.13605	1.13188
				2007.38	1.1641	1.15787	1.13988	1.13229
				2007.46	1.16589	1.15891	1.14333	1.1341
				2007.54	1.16751	1.16206	1.14425	1.13585
				2007.62	1.16995	1.16528	1.14547	1.13784
				2007.71	1.17357	1.16954	1.1475	1.14002
				2007.79	1.17732	1.17265	1.15073	1.14271
				2007.88	1.18049	1.17481	1.155	1.14502
				2007.96	1.18422	1.17751	1.15841	1.14703
				2008.04	1.1868	1.18037	1.1608	1.15157
				2008.12	1.18955	1.18385	1.16225	1.1572
				2008.21	1.19293	1.18704	1.16365	1.16166
				2008.29	1.19602	1.18955	1.16728	1.16276
				2008.38	1.1987	1.19061	1.17123	1.16327
				2008.46	1.20063	1.19174	1.17486	1.16522
				2008.54	1.20234	1.19495	1.17594	1.16712
				2008.62	1.20492	1.19831	1.17735	1.16927
				2008.71	1.20878	1.20282	1.17957	1.17163
				2008.79	1.21279	1.20626	1.18294	1.17449
				2008.88	1.21619	1.2087	1.18744	1.17695
				2008.96	1.22028	1.21156	1.19104	1.17909
				2009.04	1.22319	1.21469	1.19366	1.18383
				2009.12	1.22634	1.21848	1.19534	1.18972
				2009.21	1.23019	1.22195	1.19689	1.19443
				2009.29	1.23361	1.22474	1.20067	1.19569
				2009.38	1.23663	1.22595	1.20479	1.19635
				2009.46	1.23879	1.22723	1.20864	1.19848
				2009.54	1.24066	1.23055	1.20997	1.20058
				2009.62	1.24346	1.23411	1.21166	1.20297
				2009.71	1.24767	1.23897	1.21413	1.20556
				2009.79	1.25206	1.2429	1.21771	1.20866
				2009.88	1.25578	1.24574	1.22251	1.21132
				2009.96	1.2604	1.24883	1.22636	1.21365
				2010.04	1.2638	1.25235	1.22935	1.21865
				2010.12	1.26757	1.25659	1.23136	1.22487
				2010.21	1.2721	1.26047	1.23316	1.22991
				2010.29	1.27602	1.26367	1.23713	1.23144
				2010.38	1.27953	1.26511	1.24146	1.23232
				2010.46	1.28204	1.26664	1.24563	1.23473
				2010.54	1.28415	1.2701	1.24731	1.23713
				2010.62	1.28728	1.27394	1.24942	1.23985
				2010.71	1.29199	1.2793	1.25228	1.24279
				2010.79	1.29693	1.28393	1.25613	1.24623
				2010.88	1.30113	1.28738	1.26136	1.24918
				2010.96	1.3065	1.29081	1.26557	1.25178
				2011.04	1.31001	1.29485	1.26909	1.25713
				2011.12	1.31386	1.29952	1.27161	1.26379
				2011.21	1.31875	1.30372	1.27368	1.26928
				2011.29	1.32296	1.30722	1.27785	1.27117
				2011.38	1.32679	1.30879	1.28238	1.27236
				2011.46	1.32953	1.31044	1.28687	1.27508
				2011.54	1.33176	1.31396	1.28889	1.27782
				2011.62	1.33513	1.31802	1.2914	1.2809
				2011.71	1.34025	1.32381	1.29461	1.28418
				2011.79	1.34565	1.32908	1.29872	1.28796
				2011.88	1.35026	1.33307	1.30436	1.29119
				2011.96	1.3563	1.33679	1.30891	1.29405
				2012.04	1.35961	1.34126	1.31291	1.29974
				2012.12	1.36311	1.34623	1.31585	1.30683
				2012.21	1.36804	1.35058	1.31814	1.31274
				2012.29	1.37229	1.35419	1.32246	1.31495
				2012.38	1.37622	1.35575	1.32714	1.31637
				2012.46	1.379	1.3574	1.33187	1.31935
				2012.54	1.38122	1.3609	1.33409	1.32232
				2012.62	1.38468	1.36507	1.33684	1.32565
				2012.71	1.39003	1.37115	1.34029	1.32917
				2012.79	1.39571	1.37679	1.34458	1.3332
				2012.88	1.40055	1.3811	1.3505	1.33663
				2012.96	1.407	1.38498	1.35528	1.33966
				2013.04	1.41006	1.38971	1.35956	1.34561
				2013.12	1.41319	1.39485	1.36272	1.35304
				2013.21	1.41804	1.39925	1.3651	1.35924
				2013.29	1.42222	1.40287	1.36953	1.3616
				2013.38	1.42614	1.40434	1.37434	1.36312
				2013.46	1.42888	1.40593	1.37921	1.36623
				2013.54	1.43105	1.40942	1.38151	1.36932
				2013.62	1.43451	1.41364	1.38435	1.37278
				2013.71	1.43996	1.41986	1.3879	1.37642
				2013.79	1.44577	1.42567	1.39231	1.38058
				2013.88	1.45072	1.43009	1.3984	1.38412
				2013.96	1.45737	1.43404	1.40331	1.38724
				2014.04	1.46068	1.43894	1.40769	1.39339
				2014.12	1.46414	1.4443	1.41092	1.40105
				2014.21	1.46934	1.44891	1.41336	1.40744
				2014.29	1.47378	1.4527	1.41794	1.40985
				2014.38	1.47793	1.45424	1.4229	1.4114
				2014.46	1.48082	1.45592	1.42795	1.41461
				2014.54	1.48309	1.45952	1.43038	1.41782
				2014.62	1.48671	1.46391	1.43339	1.42141
				2014.71	1.49242	1.47041	1.43711	1.4252
				2014.79	1.49851	1.47653	1.44167	1.42954
				2014.88	1.50369	1.48121	1.44802	1.43322
				2014.96	1.51072	1.48531	1.45312	1.43647
				2015.04	1.51439	1.49049	1.45771	1.44285
				2015.12	1.51833	1.4962	1.46112	1.45082
				2015.21	1.52404	1.50113	1.4637	1.45747
				2015.29	1.52886	1.5052	1.46846	1.46002
				2015.38	1.53336	1.50689	1.47363	1.46168
				2015.46	1.53651	1.50873	1.47894	1.46506
				2015.54	1.53894	1.51248	1.48161	1.46847
				2015.62	1.5428	1.5171	1.48489	1.47229
				2015.71	1.54889	1.52398	1.48888	1.47633
				2015.79	1.55539	1.53059	1.49368	1.48092
				2015.88	1.56092	1.53568	1.50036	1.48481
				2015.96	1.56851	1.54002	1.50575	1.48826
				2016.04	1.57276	1.54564	1.51069	1.49495
				2016.12	1.57744	1.55186	1.51442	1.50331
				2016.21	1.58393	1.55726	1.51724	1.51033
				2016.29	1.58933	1.56179	1.52225	1.51313
				2016.38	1.59439	1.56373	1.52768	1.51501
				2016.46	1.59794	1.56583	1.53336	1.51868
				2016.54	1.60064	1.56976	1.53642	1.5224
				2016.62	1.60487	1.57472	1.54015	1.52659
				2016.71	1.61153	1.58217	1.54457	1.53101
				2016.79	1.61864	1.58956	1.54968	1.53598
				2016.88	1.62471	1.59531	1.55686	1.5402
				2016.96	1.63314	1.60001	1.56266	1.54394
				2017.04	1.63718	1.60618	1.56816	1.55105
				2017.12	1.64148	1.61279	1.57238	1.55993
				2017.21	1.64806	1.61841	1.57544	1.56746
				2017.29	1.65352	1.62308	1.58065	1.57062
				2017.38	1.65873	1.62502	1.5863	1.57276
				2017.46	1.66235	1.62714	1.59227	1.57674
				2017.54	1.66507	1.63107	1.5956	1.58076
				2017.62	1.66942	1.63618	1.59963	1.58525
				2017.71	1.67637	1.64397	1.60433	1.58996
				2017.79	1.68382	1.65182	1.60968	1.59523
				2017.88	1.69018	1.65795	1.61721	1.5997
				2017.96	1.69912	1.66286	1.6233	1.60365

## Sheet: TableSc-Firn-data
% Muhle et al. c-C4F8 2019 Atmospheric Chemistry and Physics Supporting Information Table Sc
% GCMS tank result for c-C4F8 [from Martin K. Vollmer 12-Oct-2016]
%
% The results are based on the SIO-14 primary calibration scale.
% mol_fract: mole fraction (dry air) in ppt.
%
% Site	Tank_ID	UAN	Parent_UAN	Sampl_date	depth	Analy_date	Analy_time	Volume	mol_fract	precision	n	Flag	Det_limit
% []	[]	[]	[]	[yyyymmdd]	[m]	[yymmdd]	[hhmm]	[L]	[ppt]	[ppt]	[]	[]	[ppt]
DSSW20K	S22L-002	UAN980141	UAN980141	19960701	15.8	120310	310	3	0.8707	0.0153	3	1	0.006
DSSW20K	MC-05	UAN980780	UAN980142	19950101	29	120315	1108	2	0.783	0.0156	2	1	0.007
DSSW20K	CA01674	UAN980143	UAN980143	19920401	37.8	120307	45	3	0.6773	0.0131	4	1	0.007
DSSW20K	MC-08	UAN980783	UAN980144	19900101	41.7	120315	640	2	0.517	0.0028	2	1	0.007
DSSW20K	MC-09	UAN980784	UAN980145	19840101	44.5	120315	2004	2	0.301	0	2	1	0.007
DSSW20K	MC-06	UAN980781	UAN980146	19700101	47	120315	212	2	0.0615	0.0021	2	1	0.007
DSSW20K	MC-04	UAN980779	UAN980147	19560101	49.5	120315	1536	2	0.018	0	2	1	0.007
DSSW20K	MC-01	UAN980776	UAN980150	19420101	52	120316	32	2	0.0185	0.0007	2	1	0.007
DSSW20K	MC-10	UAN980785	UAN980149	19420101	52	120314	857	1	0.021	0.0014	2	1	0.007
NEEM-2008	S300-B15	UAN999698	UAN999698	20080526	0	120310	1429	1.5	1.2185	0.0092	2	1	0.008
NEEM-2008	S300-B13	UAN999697	UAN999697	20080526	20	120312	226	1.5	1.168	0.0113	2	1	0.008
NEEM-2008	S300-B11	UAN999695	UAN999695	20030314	50	120312	1242	1.5	0.984	0.0085	2	1	0.008
NEEM-2008	S300-B12	UAN999696	UAN999696	19940314	64	120311	553	1.5	0.7035	0.0064	2	1	0.008
NEEM-2008	S300-B16	UAN999699	UAN999699	19791019	68	120313	229	1.5	0.246	0.0057	2	1	0.008
NEEM-2008	S300-B18	UAN999701	UAN999701	19700526	70	120312	1750	1.5	0.098	0.0014	2	1	0.008
NEEM-2008	S300-B19	UAN999702	UAN999702	19621125	72	120311	45	1.5	0.033	0	2	1	0.008
NEEM-2008	S300-B17	UAN999700	UAN999700	19560314	74	120313	737	1.5	0.0105	0.0007	2	2	0.008
NEEM-2008	S300-B20	UAN999703	UAN999703	19480913	76	120311	2118	1.5	0.0085	0.0007	2	2	0.008
SPO	S300-A23	UAN996580	UAN993582	19290731	119.87	120314	349	1	0.014	0.0014	2	2	0.012
%
% Flags used for the decisions on presence of the compound in the sample; see also det_lim.
%
% Flag 1: Peak size large enough a non-zero positive mole fraction was calculated and reported.
% Flag 2: Clear sign of a peak but very small. Mole fraction was calculated by GCWerks either using generally set parameters or using GCWerks special integration
%
% Volume: Volume sampled for each of the n measurements of a given firn air sample. It was varied depending how much firn air was available.
% det_lim: Detection limit.

## Sheet: TableSd-Firn-data-Summit
% Muhle et al. c-C4F8 2019 Atmospheric Chemistry and Physics Supporting Information Table Sd
% PFC-318 PFC-318 PFC-318
Depth	Tank	Standard	Date	C	%s	n	Name	Flag	H/A	Comment
11.32	Vas-S_2013_11.32m	J-168	131001	1.344	0.605	3	Vas-S_2013_11.32m	1	H	H used as small peak follows
74.05	Vas-S_2013_74.05m	J-168	131015	0.417	0.526	3	Vas-S_2013_74.05m	1	H	H used as small peak follows
72.21	Vas-S_2013_72.21m	J-168	131015	0.632	2.009	3	Vas-S_2013_72.21m	1	H	H used as small peak follows
20.99	Vas-S_2013_20.99m	J-168	131016	1.274	1.319	3	Vas-S_2013_20.99m	1	H	H used as small peak follows
31.83	Vas-S_2013_31.83m	J-168	131017	1.226	0.886	3	Vas-S_2013_31.83m	1	H	H used as small peak follows
0	Vas-S_2013_00.00m	J-168	131018	1.45	1.773	3	Vas-S_2013_00.00m	1	H	H used as small peak follows
68.02	Vas-S_2013_68.02m	J-168	131022	0.961	0.23	3	Vas-S_2013_68.02m	1	H	H used as small peak follows
76.04	Vas-S_2013_76.04m	J-168	131022	0.246	3.853	3	Vas-S_2013_76.04m	1	H	H used as small peak follows
44.69	Vas-S_2013_44.69m	J-168	131023	1.152	0.84	3	Vas-S_2013_44.69m	1	H	H used as small peak follows
60.25	Vas-S_2013_60.25m	J-168	131028	1.03	1.143	3	Vas-S_2013_60.25m	1	H	H used as small peak follows
78.03	Vas-S_2013_78.03m	J-168	131029	0.123	5.154	3	Vas-S_2013_78.03m	1	H	H used as small peak follows
80.06	Vas-S_2013_80.06m	J-168	131105	0.047	3.351	3	Vas-S_2013_80.06m	2	H	H used as small peak follows
69.98	Vas-S_2013_69.98m	J-168	131106	0.814	1.01	3	Vas-S_2013_69.98m	1	H	H used as small peak follows
%
% 0.5591 # Average T-tank calibration propagation assignment precision (percent, % dT/T)
% 0.3077 # Average J-tank calibration assignment precision (percent, %, dP/P)
% 0.2056 # J-168 assignment precision (percent, %, dJ/J)
% 0.0000 # Blank (absolute)
% 0.0219 # Detection limit (absolute)
%
% Assuming that the propagation of the scale via the T-tanks and J-tank to the firn sample is multiplicative, r = T * P * S, the final relative uncertainty is
% dr/r = sqrt( (dT/T)^2 + (dP/P)^2 + (ds/s)^2)
% with ds/s being the relative precision of the each firn air sample measurement given above (%s).
%
% Note, instead of the general relative J-tank calibration asssignment precision (dP/P), the relative precision of the actual J-tank (dJ/J) measurement may be used
% dr/r = sqrt( (dT/T)^2 + (dJ/J)^2 + (ds/s)^2)
%
% Note, if additional propagation steps are involved, e.g. samples were measured against a quaternary, then one (or more) additional propagation step(s)
% need to be added by multiplying the (dP/P)^2 term two (or more plus one) times
% dr/r = sqrt( (dT/T)^2 + multiple *(dP/P)^2 + (ds/s)^2)
%
% If measurement on different calibration scales were to be compared, a term for the uncertainty of the preparation of the calibration scale needs to be included.
%
% Flags:
%
% 1: peak size large enough, a non-zero positive mole fraction was calculated and reported.
% 2: clear sign of a peak, but very small. Mole fraction was calculated by GCWerks either using generally set parameters or using 'special integration'
% H: height
% A: area
% H/A=x.xx: norm HT/norm a x.xx. The closer to 1.00, the more consistent the integrations.
%

## Sheet: TableSe-India-data
% Muhle et al. c-C4F8 2019 Atmospheric Chemistry and Physics Supporting Information Table Se
Air samples were collected on-board the UK FAAM (Facility for Airborne Atmospheric Measurements) BAe-146
aircraft during eleven flights conducted from June 12, 2016 to July 9, 2016 (9–28° N, 72–86° E) into 3 L pre-
evacuated electropolished SS flasks (SilcoCan, Restek) sealed with metal bellow valves (SS-BNVVCR-4,
Swagelok). During the time it took to compress the air samples to 41 psig (30–60 s, depending on altitude) using a
metal bellows pump (PWSC 28823-7, Senior Aerospace, USA), the aircraft travelled ~7 km. Nine flights occurred
over Northern India and two over Southern India and the Indian Ocean. In total, 176 flask samples were collected,
with the majority (>90 %) of these samples filled below 1.5 km altitude. The size of the subsamples analyzed with
the Medusa 21 at University of Bristol was reduced to 1.75 L (from 2 L) and the sampling rate to 50 ml min-1 (from
100 ml min-1) to allow for triplicate analyses of each flask and to accommodate for the lower flask pressure. c-C4F8
measurements are reported on the SIO-14 calibration scale. Detection limits, blanks, and precisions were similar to
those stated above. For further details, see Say et al. (2019)
Data are contained in
MONSOON-WAS-GCMS_MONSOON-FAAM_20160101_pfc318-various.nc
These data are also be available under:
https://catalogue.ceda.ac.uk/uuid/a36266fd19f5419eb9e5cdffe8ec58f9?jump=related-anchor&search_url=%2F%253Fq%253Dmonsoon%26results_per_page%253D20%26sort_by%253Drelevance%26record_types%253DProject
http://data.ceda.ac.uk/badc/sa-monsoon/data/swaami/bristol-gcms/
http://dap.ceda.ac.uk/thredds/fileServer/badc/sa-monsoon/data/swaami/bristol-gcms//bristol-gcms_faam_20160101_b957-b976_was-bottles-pfc318.nc

## Sheet: Table-Sf-Filtered-NH-tank-data
% Muhle et al. c-C4F8 2019 Atmospheric Chemistry and Physics Supporting Information Table Sf
% Summary of filtered means for: PFC318
% Northern Hemisphere Tank Measurements.
%
% NOTES:
% Sampling date and time (yymmdd and hhmn) given in GMT.
%
% Data have been filtered with an iterative process of fitting followed by statistical outlier exclusion.
% The filtering process uses for all available AGAGE extra-tropical NH data.
% The filtering process uses pollution filtered monthly-mean in-situ Medusa (if available).
% The filtering process uses NH tank data listed here and in other files (if applicable).
% The filtering process also filters the in-situ data and results are listed in separately.
% The fit for the SH data has been used during the filtering of NH data.
% The mean_C and sd_C are the mean and standard deviation results,
% respectively. They are expressed as a dry gas mixing ratio in ppt,
% on the "SIO-14" absolute calibration scale.
% On this scale, R1 has an assigned value of 1.2660 ppt.
%
% Name	Fill_date	decimal.date	mean_C	sd_C	n
CDK34816Q	740621	1974.47	0.24	0.0011	8
CDK34770Q	730629	1973.49	0.249	0.0017	3
CDK34816Q	740621	1974.47	0.237	0.0044	3
CDK34816Q	740621	1974.47	0.239	0.0043	4
CDK34816Q	740621	1974.47	0.239	0.0037	11
CDK35354Q	751001	1975.75	0.286	0.0048	3
CDK63981Q	771004	1977.76	0.384	0.0145	2
CDK64012Q	771004	1977.76	0.408	0.0077	3
CDK10068Q	820323	1982.22	0.52	0.0037	5
CDK10068Q	820323	1982.22	0.519	0.0115	3
CDK3758Q	820507	1982.35	0.517	0.0054	5
RKHA5178	860910	1986.69	0.708	0.0058	4
HH26936	910329	1991.24	0.805	0.0068	3
TH980131.5258	980131	1998.08	0.947	0.003	3
UAN920470	800515	1980.37	0.4466	0.0076	4
CDK34770Q	730629	1973.49	0.2491	0.0017	3
CDK34816Q	740621	1974.47	0.2381	0.0042	7
CDK35354Q	751001	1975.75	0.2864	0.0048	3
CDK63981Q	771004	1977.76	0.3843	0.0146	2
CDK64012Q	771004	1977.76	0.4076	0.0077	3
CDK10068Q	820323	1982.22	0.52	0.0068	8
CDK3758Q	820507	1982.35	0.5168	0.0054	5
RKHA5178	860910	1986.69	0.708	0.0058	4
HH26936	910329	1991.24	0.8045	0.0068	3

## Sheet: Table-Sg-Filtered-SH-tank-data
% Muhle et al. c-C4F8 2019 Atmospheric Chemistry and Physics Supporting Information Table Sg
% Summary of filtered means for: PFC318
% Southern Hemisphere Tank Measurements including Cape Grim Air Archive (CGAA).
%
% NOTES:
% Sampling date and time (yymmdd and hhmn) given in GMT.
%
% Data have been filtered with an iterative process of fitting followed by statistical outlier exclusion.
% The filtering process uses for all available AGAGE extra-tropical SH data.
% The filtering process uses pollution filtered monthly-mean in-situ Medusa data (if available).
% The filtering process uses CGAA (SH) and SH tank data listed here and in other files (if applicable).
% The filtering process also filters the in-situ data and results are listed in separately.
%
% The mean_C and sd_C are the mean and standard deviation results,
% respectively. They are expressed as a dry gas mixing ratio in ppt,
% on the "SIO-14" absolute calibration scale.
% On this scale, R1 has an assigned value of 1.2660 ppt.
%
% Name	yymmdd	decimal.date	mean_C	sd_C	n
UAN780002	780707	1978.51	0.345	0.0011	3
UAN840004	840523	1984.39	0.5327	0.0059	4
UAN860001	860206	1986.1	0.5984	0.0084	4
UAN870006	870528	1987.4	0.6697	0.0126	6
UAN880003	880621	1988.47	0.6725	0.0056	3
UAN890004	890519	1989.38	0.7119	0.0086	8
UAN910361	910829	1991.66	0.7537	0.0067	3
UAN920655	920923	1992.73	0.8241	0.005	5
UAN960051	951204	1995.92	0.8926	0.0158	5
UAN970092	961120	1996.89	0.8828	0.0076	4
UAN970008	970107	1997.02	0.8892	0.0085	5
UAN970756	970530	1997.41	0.8968	0.0039	4
UAN971115	970715	1997.53	0.8913	0.0069	7
UAN980918	980625	1998.48	0.9209	0.0156	5
UAN991062	990413	1999.28	0.9417	0.0127	5
UAN20101335	301	2000.16	0.9795	0.0112	6
UAN992982	314	2000.2	0.9607	0.012	5
UAN993563	10115	2001.04	0.9901	0.0097	4
UAN994885	10719	2001.55	0.9936	0.0048	5
UAN995445	30217	2003.13	1.0159	0.0053	5
UAN996455	31003	2003.75	1.0255	0.0105	5
UAN998318	40122	2004.06	1.0401	0.0158	6
UAN997089	41201	2004.92	1.061	0.0091	18
UAN997090	50210	2005.11	1.0662	0.0043	5
UAN998005	50628	2005.49	1.0784	0.0118	18
UAN998195	60210	2006.11	1.0971	0.0175	14
G-139	61004	2006.76	1.1001	0.0105	6
UAN998425	61019	2006.8	1.1285	0.0093	6
UAN998852	61211	2006.94	1.109	0.0099	4
UAN998898	70508	2007.35	1.145	0.0208	5
UAN999276	71122	2007.89	1.1487	0.0088	4
UAN20100047	81216	2008.96	1.1849	0.0084	5
UAN20100609	90306	2009.18	1.2097	0.0264	8
G-182	101216	2010.96	1.2542	0.0106	74
G-044	950901	1995.67	0.863	0.0064	11
G-181	101210	2010.94	1.239	0.0195	10
G-181	101210	2010.94	1.253	0.0095	11
G-181	101210	2010.94	1.25	0.0083	12
G-189	110606	2011.43	1.262	0.0167	11
G-189	110606	2011.43	1.271	0.0067	12
UAN20101459	860206	1986.1	0.601	0.008	3
G-038	950208	1995.1	0.841	0.0075	2
G-044	950901	1995.67	0.862	0.0033	9
G-045	951123	1995.89	0.842	0.0068	3
UAN20101460	951204	1995.92	0.875	0.0109	3
UAN20101461	980625	1998.48	0.91	0.0122	3
UAN20101458	10115	2001.04	0.987	0.0089	3
SC2294	50304	2005.17	1.062	NaN	1
SC4254	50304	2005.17	1.072	NaN	1
UAN20101457	60210	2006.11	1.093	0.0128	3
UAN20101446	70921	2007.72	1.143	0.0095	3
UAN20101445	80812	2008.61	1.173	0.0023	3
G-181	101210	2010.94	1.251	0.0086	5
G-181	101210	2010.94	1.245	0.0071	11
G-181	101210	2010.94	1.25	0.0068	7
G-038	950208	1995.1	0.8409	0.0074	2
G-045	951123	1995.89	0.8424	0.0068	3
G-181	101210	2010.94	1.2477	0.0075	23

## Sheet: Table-Sh-Filtered-JFJ
% Muhle et al. c-C4F8 2019 Atmospheric Chemistry and Physics Supporting Information Table Sh
% Summary of filtered monthly means for: PFC318
% JFJ_Medusa
%
% NOTES:
% Sampling date and time (yymmdd and hhmn) given in GMT.
%
% These data are extracts from the original pollution free monthly means data files created by Hsiang J. (Ray) Wang.
%
% Data have been filtered with an iterative process of fitting followed by statistical outlier exclusion.
% The filtering process uses for all available AGAGE extra-tropical NH data.
% The filtering process uses pollution filtered monthly-mean in-situ Medusa data (if available).
% The filtering procees uses NH tank data listed elsewhere.
% The fit for the SH data has been used during the filtering of NH data.
% The mean_C and sd_C are pollution filtered monthly mean and standard deviation results, respectively.
% They are expressed as a dry gas mixing ratio in ppt, on the "SIO-14" absolute calibration scale.
% On this scale, R1 has an assigned value of 1.266 ppt.
%
% DateStr	yymmdd	hhmm	decimal.date	mean_C	sd_C	n
2009-05-01	90517	2100	2009.38	1.242	0.016	91
2009-06-01	90617	405	2009.46	1.241	0.015	266
2009-07-01	90717	1955	2009.54	1.245	0.014	277
2009-08-01	90817	300	2009.62	1.242	0.013	236
2009-09-01	90916	1005	2009.71	1.247	0.014	269
2009-10-01	91017	155	2009.79	1.251	0.015	290
2009-11-01	91116	900	2009.88	1.251	0.015	335
2009-12-01	91216	1605	2009.96	1.256	0.015	279
2010-01-01	100116	755	2010.04	1.258	0.015	293
2010-02-01	100215	1500	2010.12	1.257	0.015	420
2010-03-01	100317	2205	2010.21	1.263	0.016	485
2010-04-01	100417	1355	2010.29	1.271	0.018	388
2010-05-01	100517	2100	2010.38	1.28	0.017	410
2010-06-01	100617	405	2010.46	1.275	0.019	389
2010-07-01	100717	1955	2010.54	1.282	0.02	171
2010-08-01	100817	300	2010.62	1.283	0.021	436
2010-09-01	100916	1005	2010.71	1.283	0.024	424
2010-10-01	101017	155	2010.79	1.291	0.018	322
2010-11-01	101116	900	2010.88	1.292	0.022	92
2010-12-01	101216	1605	2010.96	1.3	0.018	459
2011-01-01	110116	755	2011.04	1.299	0.018	457
2011-02-01	110215	1500	2011.12	1.307	0.018	300
2011-03-01	110317	2205	2011.21	1.316	0.017	251
2011-04-01	110417	1355	2011.29	1.323	0.021	248
2011-05-01	110517	2100	2011.38	1.328	0.019	451
2011-06-01	110617	405	2011.46	1.333	0.019	426
2011-07-01	110717	1955	2011.54	1.343	0.016	376
2011-08-01	110817	300	2011.62	1.342	0.017	426
2011-09-01	110916	1005	2011.71	1.345	0.016	293
2011-10-01	111017	155	2011.79	1.345	0.015	339
2011-11-01	111116	900	2011.88	1.345	0.014	410
2011-12-01	111216	1605	2011.96	1.351	0.016	443
2012-01-01	120116	856	2012.04	1.347	0.017	361
2012-02-01	120215	1800	2012.12	1.348	0.015	150
2012-03-01	120317	304	2012.21	1.35	0.017	271
2012-04-01	120416	2056	2012.29	1.364	0.017	218
2012-05-01	120517	600	2012.38	1.373	0.017	356
2012-06-01	120616	1504	2012.46	1.378	0.016	393
2012-07-01	120717	856	2012.54	1.385	0.017	381
2012-08-01	120816	1800	2012.62	1.39	0.022	366
2012-09-01	120916	304	2012.71	1.395	0.028	403
2012-10-01	121016	2056	2012.79	1.396	0.025	416
2012-11-01	121116	600	2012.88	1.406	0.019	344
2012-12-01	121216	1504	2012.96	1.409	0.017	414
2013-01-01	130116	755	2013.04	1.41	0.017	220
2013-02-01	130215	1500	2013.12	1.415	0.017	376
2013-03-01	130317	2205	2013.21	1.414	0.018	373
2013-04-01	130417	1355	2013.29	1.423	0.02	379
2013-05-01	130517	2100	2013.38	1.427	0.021	175
2013-06-01	130617	405	2013.46	1.431	0.014	144
2013-07-01	130717	1955	2013.54	1.435	0.015	344
2013-08-01	130817	300	2013.62	1.435	0.018	306
2013-09-01	130916	1005	2013.71	1.437	0.019	169
2013-10-01	131017	155	2013.79	1.445	0.021	259
2013-11-01	131116	900	2013.88	1.438	0.024	213
2013-12-01	131216	1605	2013.96	1.445	0.024	273
2014-01-01	140116	755	2014.04	1.446	0.027	335
2014-02-01	140215	1500	2014.12	1.454	0.025	359
2014-03-01	140317	2205	2014.21	1.456	0.024	375
2014-04-01	140417	1355	2014.29	1.461	0.016	213
2014-05-01	140517	2100	2014.38	1.468	0.017	251
2014-06-01	140617	405	2014.46	1.485	0.016	386
2014-07-01	140717	1955	2014.54	1.488	0.019	332
2014-08-01	140817	300	2014.62	1.486	0.017	325
2014-09-01	140916	1005	2014.71	1.49	0.02	376
2014-10-01	141017	155	2014.79	1.495	0.021	206
2014-11-01	141116	900	2014.88	1.492	0.022	327
2014-12-01	141216	1605	2014.96	1.506	0.018	189
2015-01-01	150116	755	2015.04	1.508	0.019	231
2015-02-01	150215	1500	2015.12	1.504	0.019	234
2015-03-01	150317	2205	2015.21	1.499	0.018	355
2015-04-01	150417	1355	2015.29	1.503	0.021	210
2015-05-01	150517	2100	2015.38	1.513	0.021	313
2015-06-01	150617	405	2015.46	1.523	0.021	166
2015-07-01	150717	1955	2015.54	1.523	0.019	186
2015-08-01	150817	300	2015.62	1.53	0.016	322
2015-09-01	150916	1005	2015.71	1.537	0.018	375
2015-10-01	151017	155	2015.79	1.536	0.02	305
2015-11-01	151116	900	2015.88	1.538	0.022	351
2015-12-01	151216	1605	2015.96	1.547	0.018	365
2016-01-01	160116	856	2016.04	1.553	0.019	392
2016-02-01	160215	1800	2016.12	1.556	0.019	337
2016-03-01	160317	304	2016.21	1.562	0.021	284
2016-04-01	160416	2056	2016.29	1.57	0.02	247
2016-05-01	160517	600	2016.38	1.579	0.02	353
2016-06-01	160616	1504	2016.46	1.584	0.022	162
2016-07-01	160717	856	2016.54	1.591	0.023	273
2016-08-01	160816	1800	2016.62	1.593	0.024	283
2016-09-01	160916	304	2016.71	1.598	0.017	353
2016-10-01	161016	2056	2016.79	1.613	0.017	342
2016-11-01	161116	600	2016.88	1.615	0.017	215
2016-12-01	161216	1504	2016.96	1.615	0.021	389
2017-01-01	170116	755	2017.04	1.619	0.022	382
2017-02-01	170215	1500	2017.12	1.618	0.025	196
2017-03-01	170317	2205	2017.21	1.627	0.026	392
2017-04-01	170417	1355	2017.29	1.637	0.025	367
2017-05-01	170517	2100	2017.38	1.642	0.023	320
2017-06-01	170617	405	2017.46	1.651	0.023	371
2017-07-01	170717	1955	2017.54	1.659	0.022	381
2017-08-01	170817	300	2017.62	1.661	0.025	393
2017-09-01	170916	1005	2017.71	1.672	0.026	269
2017-10-01	171017	155	2017.79	1.68	0.027	274
2017-11-01	171116	900	2017.88	1.681	0.024	256
2017-12-01	171216	1605	2017.96	1.686	0.022	400
2018-01-01	180116	755	2018.04	1.685	0.023	406

## Sheet: Table-Si-Filtered-MHD
% Muhle et al. c-C4F8 2019 Atmospheric Chemistry and Physics Supporting Information Table Si
% Summary of filtered monthly means for: PFC318
% MHD_Medusa
%
% NOTES:
% Sampling date and time (yymmdd and hhmn) given in GMT.
%
% These data are extracts from the original pollution free monthly means data files created by Hsiang J. (Ray) Wang.
%
% Data have been filtered with an iterative process of fitting followed by statistical outlier exclusion.
% The filtering process uses for all available AGAGE extra-tropical NH data.
% The filtering process uses pollution filtered monthly-mean in-situ Medusa data (if available).
% The filtering procees uses NH tank data listed elsewhere.
% The fit for the SH data has been used during the filtering of NH data.
% The mean_C and sd_C are pollution filtered monthly mean and standard deviation results, respectively.
% They are expressed as a dry gas mixing ratio in ppt, on the "SIO-14" absolute calibration scale.
% On this scale, R1 has an assigned value of 1.266 ppt.
%
% DateStr	yymmdd	hhmm	decimal.date	mean_C	sd_C	n
2010-06-01	100617	405	2010.46	1.289	0.027	95
2010-07-01	100717	1955	2010.54	1.287	0.023	325
2010-08-01	100817	300	2010.62	1.289	0.024	262
2010-09-01	100916	1005	2010.71	1.297	0.024	239
2010-10-01	101017	155	2010.79	1.3	0.021	288
2010-11-01	101116	900	2010.88	1.31	0.027	259
2010-12-01	101216	1605	2010.96	1.304	0.03	302
2011-01-01	110116	755	2011.04	1.3	0.03	270
2011-02-01	110215	1500	2011.12	1.308	0.028	262
2011-03-01	110317	2205	2011.21	1.315	0.014	281
2011-04-01	110417	1355	2011.29	1.324	0.013	311
2011-05-01	110517	2100	2011.38	1.327	0.012	333
2011-06-01	110617	405	2011.46	1.332	0.012	303
2011-07-01	110717	1955	2011.54	1.338	0.013	293
2011-08-01	110817	300	2011.62	1.343	0.015	307
2011-09-01	110916	1005	2011.71	1.348	0.015	327
2011-10-01	111017	155	2011.79	1.352	0.014	340
2011-11-01	111116	900	2011.88	1.353	0.015	302
2011-12-01	111216	1605	2011.96	1.353	0.016	337
2012-01-01	120116	856	2012.04	1.356	0.018	330
2012-02-01	120215	1800	2012.12	1.356	0.014	280
2012-03-01	120317	304	2012.21	1.361	0.018	320
2012-04-01	120416	2056	2012.29	1.37	0.019	319
2012-05-01	120517	600	2012.38	1.375	0.017	329
2012-06-01	120616	1504	2012.46	1.376	0.013	324
2012-07-01	120717	856	2012.54	1.375	0.013	281
2012-08-01	120816	1800	2012.62	1.38	0.016	295
2012-09-01	120916	304	2012.71	1.38	0.017	269
2012-10-01	121016	2056	2012.79	1.396	0.017	271
2012-11-01	121116	600	2012.88	1.399	0.017	322
2012-12-01	121216	1504	2012.96	1.404	0.016	309
2013-01-01	130116	755	2013.04	1.405	0.013	322
2013-02-01	130215	1500	2013.12	1.406	0.015	283
2013-03-01	130317	2205	2013.21	1.41	0.013	325
2013-04-01	130417	1355	2013.29	1.415	0.01	271
2013-05-01	130517	2100	2013.38	1.422	0.012	312
2013-06-01	130617	405	2013.46	1.434	0.012	214
2013-07-01	130717	1955	2013.54	1.438	0.014	165
2013-09-01	130916	1005	2013.71	1.439	0.009	97
2013-10-01	131017	155	2013.79	1.448	0.009	272
2013-11-01	131116	900	2013.88	1.453	0.009	137
2013-12-01	131216	1605	2013.96	1.456	0.008	197
2014-01-01	140116	755	2014.04	1.46	0.008	194
2014-02-01	140215	1500	2014.12	1.461	0.009	233
2014-03-01	140317	2205	2014.21	1.461	0.011	237
2014-04-01	140417	1355	2014.29	1.467	0.011	231
2014-05-01	140517	2100	2014.38	1.477	0.011	130
2014-06-01	140617	405	2014.46	1.478	0.01	163
2014-07-01	140717	1955	2014.54	1.485	0.011	289
2014-08-01	140817	300	2014.62	1.493	0.01	295
2014-09-01	140916	1005	2014.71	1.498	0.011	151
2014-10-01	141017	155	2014.79	1.506	0.01	272
2014-11-01	141116	900	2014.88	1.515	0.011	244
2014-12-01	141216	1605	2014.96	1.516	0.012	310
2015-01-01	150116	755	2015.04	1.52	0.011	271
2015-02-01	150215	1500	2015.12	1.516	0.015	226
2015-03-01	150317	2205	2015.21	1.523	0.014	278
2015-04-01	150417	1355	2015.29	1.522	0.016	285
2015-05-01	150517	2100	2015.38	1.525	0.016	278
2015-06-01	150617	405	2015.46	1.532	0.014	172
2015-07-01	150717	1955	2015.54	1.538	0.014	297
2015-08-01	150817	300	2015.62	1.54	0.015	312
2015-09-01	150916	1005	2015.71	1.546	0.014	259
2015-10-01	151017	155	2015.79	1.553	0.014	313
2015-11-01	151116	900	2015.88	1.557	0.015	285
2015-12-01	151216	1605	2015.96	1.563	0.019	304
2016-01-01	160116	856	2016.04	1.563	0.021	256
2016-02-01	160215	1800	2016.12	1.561	0.024	282
2016-03-01	160317	304	2016.21	1.562	0.02	246
2016-04-01	160416	2056	2016.29	1.573	0.012	292
2016-05-01	160517	600	2016.38	1.584	0.014	237
2016-06-01	160616	1504	2016.46	1.591	0.013	239
2016-07-01	160717	856	2016.54	1.6	0.015	288
2016-08-01	160816	1800	2016.62	1.605	0.015	304
2016-09-01	160916	304	2016.71	1.604	0.017	272
2016-10-01	161016	2056	2016.79	1.621	0.02	296
2016-11-01	161116	600	2016.88	1.626	0.021	283
2016-12-01	161216	1504	2016.96	1.622	0.02	296
2017-01-01	170116	755	2017.04	1.628	0.024	272
2017-02-01	170215	1500	2017.12	1.63	0.019	280
2017-03-01	170317	2205	2017.21	1.635	0.024	299
2017-04-01	170417	1355	2017.29	1.638	0.024	284
2017-05-01	170517	2100	2017.38	1.646	0.027	245
2017-06-01	170617	405	2017.46	1.654	0.022	301
2017-07-01	170717	1955	2017.54	1.671	0.021	301
2017-08-01	170817	300	2017.62	1.676	0.019	311
2017-09-01	170916	1005	2017.71	1.678	0.019	103
2017-10-01	171017	155	2017.79	1.695	0.013	89
2017-11-01	171116	900	2017.88	1.697	0.014	265
2017-12-01	171216	1605	2017.96	1.693	0.015	166
2018-01-01	180116	755	2018.04	1.701	0.014	305

## Sheet: Table-Sj-Filtered-SIO
% Muhle et al. c-C4F8 2019 Atmospheric Chemistry and Physics Supporting Information Table Sj
% Summary of filtered monthly means for: PFC318
% SIO_Medusa1
%
% NOTES:
% Sampling date and time (yymmdd and hhmn) given in GMT.
%
% These data are extracts from the original pollution free monthly means data files created by Hsiang J. (Ray) Wang.
%
% Data have been filtered with an iterative process of fitting followed by statistical outlier exclusion.
% The filtering process uses for all available AGAGE extra-tropical NH data.
% The filtering process uses pollution filtered monthly-mean in-situ Medusa data (if available).
% The filtering procees uses NH tank data listed elsewhere.
% The fit for the SH data has been used during the filtering of NH data.
% The mean_C and sd_C are pollution filtered monthly mean and standard deviation results, respectively.
% They are expressed as a dry gas mixing ratio in ppt, on the "SIO-14" absolute calibration scale.
% On this scale, R1 has an assigned value of 1.266 ppt.
%
% DateStr	yymmdd	hhmm	decimal.date	mean_C	sd_C	n
2009-11-01	91116	900	2009.88	1.268	0.018	156
2009-12-01	91216	1605	2009.96	1.266	0.019	262
2010-01-01	100116	755	2010.04	1.27	0.019	225
2010-02-01	100215	1500	2010.12	1.272	0.019	209
2010-03-01	100317	2205	2010.21	1.273	0.018	222
2010-04-01	100417	1355	2010.29	1.274	0.017	203
2010-05-01	100517	2100	2010.38	1.277	0.017	181
2010-06-01	100617	405	2010.46	1.285	0.018	260
2010-07-01	100717	1955	2010.54	1.29	0.013	82
2010-08-01	100817	300	2010.62	1.292	0.012	259
2010-09-01	100916	1005	2010.71	1.293	0.014	165
2010-10-01	101017	155	2010.79	1.296	0.014	305
2010-11-01	101116	900	2010.88	1.3	0.014	157
2010-12-01	101216	1605	2010.96	1.301	0.018	263
2011-01-01	110116	755	2011.04	1.3	0.016	126
2011-02-01	110215	1500	2011.12	1.308	0.016	258
2011-03-01	110317	2205	2011.21	1.316	0.02	190
2011-04-01	110417	1355	2011.29	1.324	0.014	52
2011-05-01	110517	2100	2011.38	1.331	0.021	153
2011-06-01	110617	405	2011.46	1.339	0.02	275
2011-07-01	110717	1955	2011.54	1.34	0.018	187
2011-08-01	110817	300	2011.62	1.336	0.021	204
2011-09-01	110916	1005	2011.71	1.344	0.024	232
2011-10-01	111017	155	2011.79	1.354	0.021	182
2011-11-01	111116	900	2011.88	1.35	0.019	185
2011-12-01	111216	1605	2011.96	1.347	0.016	223
2012-01-01	120116	856	2012.04	1.359	0.018	136
2012-02-01	120215	1800	2012.12	1.352	0.015	149
2012-03-01	120317	304	2012.21	1.352	0.016	269
2012-04-01	120416	2056	2012.29	1.366	0.015	184
2012-05-01	120517	600	2012.38	1.374	0.015	152
2012-06-01	120616	1504	2012.46	1.385	0.017	218
2012-07-01	120717	856	2012.54	1.396	0.015	204
2012-08-01	120816	1800	2012.62	1.394	0.016	263
2012-09-01	120916	304	2012.71	1.4	0.017	151
2012-10-01	121016	2056	2012.79	1.42	0.018	83
2012-11-01	121116	600	2012.88	1.408	0.014	200
2012-12-01	121216	1504	2012.96	1.409	0.015	201
2013-01-01	130116	755	2013.04	1.407	0.014	248
2013-02-01	130215	1500	2013.12	1.414	0.015	180
2013-03-01	130317	2205	2013.21	1.421	0.015	189
2013-04-01	130417	1355	2013.29	1.422	0.015	216
2013-05-01	130517	2100	2013.38	1.429	0.013	216
2013-06-01	130617	405	2013.46	1.434	0.01	212
2013-07-01	130717	1955	2013.54	1.436	0.013	244
2013-08-01	130817	300	2013.62	1.434	0.012	97
2014-01-01	140116	755	2014.04	1.452	0.012	93
2014-02-01	140215	1500	2014.12	1.452	0.013	178
2014-03-01	140317	2205	2014.21	1.451	0.013	238
2014-04-01	140417	1355	2014.29	1.463	0.014	230
2014-05-01	140517	2100	2014.38	1.474	0.014	165
2014-06-01	140617	405	2014.46	1.487	0.014	209
2014-07-01	140717	1955	2014.54	1.477	0.015	215
2014-08-01	140817	300	2014.62	1.477	0.014	243
2014-09-01	140916	1005	2014.71	1.488	0.014	241
2014-10-01	141017	155	2014.79	1.511	0.017	216
2014-11-01	141116	900	2014.88	1.51	0.016	264
2014-12-01	141216	1605	2014.96	1.51	0.018	257
2015-01-01	150116	755	2015.04	1.512	0.02	163
2015-02-01	150215	1500	2015.12	1.508	0.019	110
2015-03-01	150317	2205	2015.21	1.509	0.02	182
2015-04-01	150417	1355	2015.29	1.517	0.017	218
2015-05-01	150517	2100	2015.38	1.529	0.018	174
2015-06-01	150617	405	2015.46	1.531	0.02	193
2015-07-01	150717	1955	2015.54	1.532	0.016	226
2015-08-01	150817	300	2015.62	1.541	0.014	281
2015-09-01	150916	1005	2015.71	1.545	0.016	286
2015-10-01	151017	155	2015.79	1.548	0.019	246
2015-11-01	151116	900	2015.88	1.561	0.017	191
2015-12-01	151216	1605	2015.96	1.565	0.015	254
2016-01-01	160116	856	2016.04	1.566	0.015	215
2016-02-01	160215	1800	2016.12	1.572	0.015	94
2016-03-01	160317	304	2016.21	1.573	0.017	138
2016-04-01	160416	2056	2016.29	1.592	0.017	223
2016-05-01	160517	600	2016.38	1.596	0.015	300
2016-06-01	160616	1504	2016.46	1.6	0.016	190
2016-07-01	160717	856	2016.54	1.618	0.015	224
2016-08-01	160816	1800	2016.62	1.614	0.016	260
2016-09-01	160916	304	2016.71	1.607	0.015	277
2016-10-01	161016	2056	2016.79	1.62	0.016	214
2016-11-01	161116	600	2016.88	1.63	0.015	195
2016-12-01	161216	1504	2016.96	1.629	0.016	272
2017-01-01	170116	755	2017.04	1.631	0.015	241
2017-02-01	170215	1500	2017.12	1.632	0.014	233
2017-03-01	170317	2205	2017.21	1.641	0.015	269
2017-04-01	170417	1355	2017.29	1.658	0.017	168
2017-05-01	170517	2100	2017.38	1.669	0.012	234
2017-06-01	170617	405	2017.46	1.675	0.014	154
2017-07-01	170717	1955	2017.54	1.686	0.013	220
2017-08-01	170817	300	2017.62	1.673	0.017	262
2017-09-01	170916	1005	2017.71	1.683	0.02	214
2017-10-01	171017	155	2017.79	1.697	0.02	261
2017-11-01	171116	900	2017.88	1.695	0.022	265
2017-12-01	171216	1605	2017.96	1.71	0.023	197
2018-01-01	180116	755	2018.04	1.707	0.023	216

[truncated: 4 more sheets: Table-Sk-Filtered-THD, Table-Sl-Filtered-ASA, Table-Sm-Filtered-CGO, Table-Sn-other-data]
