# Supplementary material for: Perfluorocyclobutane (PFC-318, c -C 4 F 8 ) in the global atmosphere
Source: Copernicus journal article supplement (doi:10.5194/acp-19-10335-2019), 2019-08-14
Supplement: Supplementary file [file acp-19-10335-2019-supplement-title-page.pdf › acp-19-10335-2019-supplement-title-page.pdf]

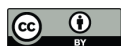

## *Supplement of*

# **Perfluorocyclobutane (PFC-318, $c\text{-C}_4\text{F}_8$ ) in the global atmosphere**

**Jens Mühle et al.**

*Correspondence to:* Jens Mühle ([jmuhle@ucsd.edu](mailto:jmuhle@ucsd.edu))

- [acp-19-10335-2019-supplement-title-page.pdf](#)
- [MONSOON-WAS-GCMS\\_MONSOON-FAAM\\_20160101\\_pfc318-various.nc](#)
- [Muhle et al. c-C4F8 2019 Supplement.pdf](#)
- [Muhle et al. c-C4F8 2019 Supplemental tables.xlsx](#)

The copyright of individual parts of the supplement might differ from the CC BY 4.0 License.
